# Supplementary material for: DPD simulations on mixed polymeric DOX-loaded micelles assembled from PCL-SS-PPEGMA/PDEA–PPEGMA and their dual pH/reduction-responsive release
Source: Royal Society of Chemistry journal article supplement (doi:10.1039/d1cp02750f), 2021-01-01
Supplement: d1cp02750f1.pdf [file d1cp02750f1.pdf]

Electronic Supplementary Information (ESI) Available

**DPD Simulations on Mixed Polymeric DOX-loaded Micelles  
Assembled from PCL-SS-PPEGMA/ PDEAEMA-PPEGMA and  
Their Dual pH/Reduction-responsive Release**

Zexiong Yang<sup>1</sup>, Delin Wang<sup>1</sup>, Haiqian Zhao<sup>1</sup>, Li Yin<sup>1</sup>, Kenxiang Cai<sup>1</sup>, Zehua lin<sup>1</sup>, Tao  
Chen<sup>1</sup>, Chufen Yang<sup>1,\*</sup>

*<sup>1</sup>School of Chemical Engineering and Light Industry, Guangdong University of  
Technology, Guangzhou 510006, PR China*

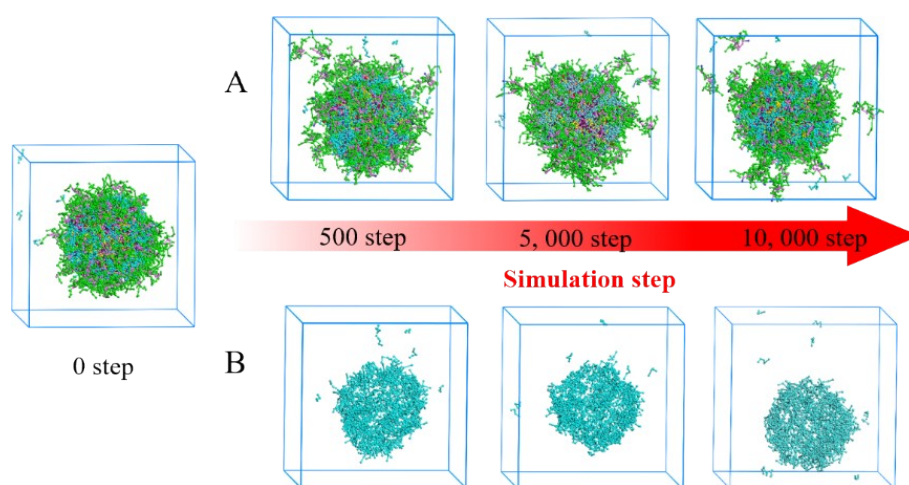

**Figure S1** DPD simulation for reduction-responsive DOX release process: Morphology changes with all components shown (A) and with only DOX shown (B).

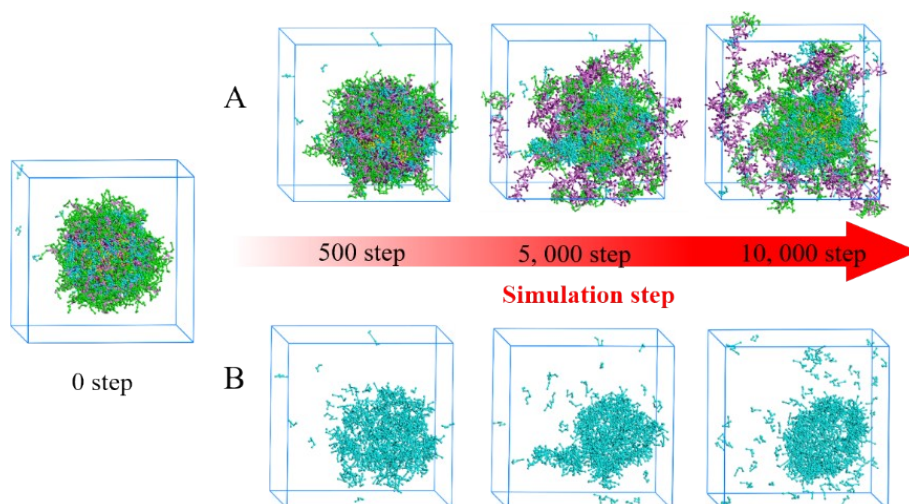

**Figure S2** DPD simulation for pH-responsive DOX release process: Morphology changes with all components shown (A) and with only DOX shown (B).

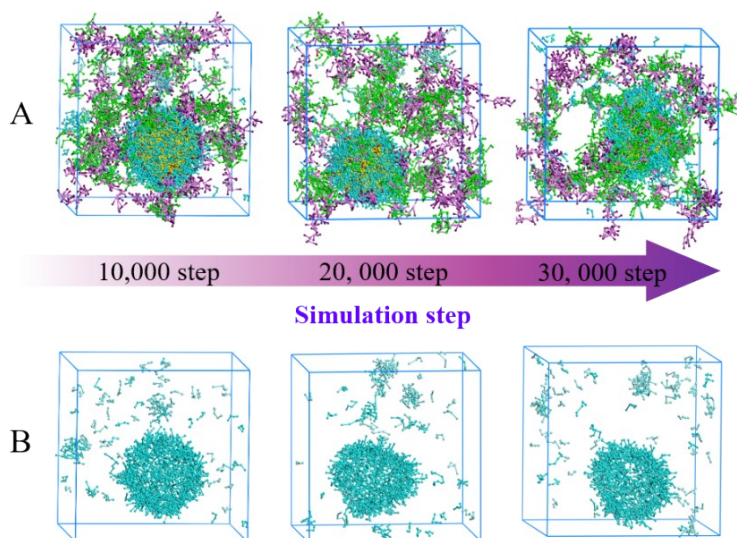

**Figure S3** DPD simulation for dual pH/reduction-responsive DOX release process up to 30, 000 step: Morphology changes with all components shown (A) and with only DOX shown (B)

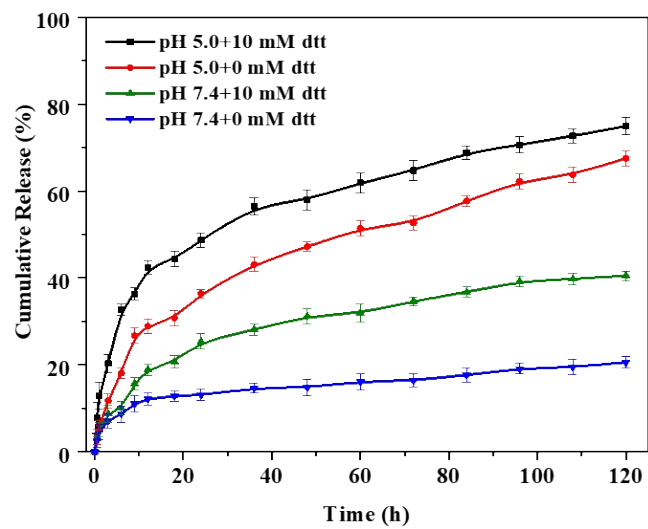

**Figure S4** Experimental in vitro drug release curves of DOX-loaded mixed micelles
